# Supplementary material for: Metabolic regulation and antihyperglycemic properties of diet-derived PGG through transcriptomic and metabolomic profiling
Source: Royal Society of Chemistry journal article supplement (doi:10.1039/d3fo00997a), 2023-01-01
Supplement: d3fo00997a1.pdf [file d3fo00997a1.pdf]

# Metabolic Regulation and Antihyperglycemic Properties of the Diet-derived PGG through Transcriptomic and Metabolomic Profiling

An-Nan Zhang<sup>†</sup>, Chengdi Huang<sup>†</sup>, Lili Yan, Xiaoyi, Liu, Fengyu, Wang, Zhichao Zhang, Luqi Li, Cunli Zhang\* and Qiang Zhang\*

Shaanxi Key Laboratory of Natural Products & Chemical Biology, College of Chemistry &  
Pharmacy, Northwest A&F University, Yangling, 712100, Shanxi, China

|                                                                  |   |
|------------------------------------------------------------------|---|
| <b>Table S1.</b> Plant distribution of PGG.....                  | 2 |
| <b>Table S2.</b> Primer Sequences for qRT-PCR .....              | 4 |
| <b>Table S3.</b> Biological activities of PGG. ....              | 5 |
| <b>Table S4.</b> Pathways associated with the action of PGG..... | 6 |

**Table S1.** Plant distribution of PGG

| family            | genus          | Canonical Name            |
|-------------------|----------------|---------------------------|
| Rhizobiaceae      | Rhizobium      | Agrobacterium rhizogenes  |
| Caryocaraceae     | Caryocar       | Caryocar villosum         |
| Rhizobiaceae      | Rhizobium      | Rhizobium rhizogenes      |
| Lythraceae        | Cuphea         | Cuphea hyssopifolia       |
| Lythraceae        | Punica         | Punica granatum           |
| Lythraceae        | Woodfordia     | Woodfordia fruticosa      |
| Combretaceae      | Terminalia     | Terminalia chebula        |
| Phyllanthaceae    | Phyllanthus    | Phyllanthus emblica       |
| Myrtaceae         | Eucalyptus     | Eucalyptus alba           |
| Amaranthaceae     | Cornulaca      | Cornulaca monacantha      |
| Juglandaceae      | Rhoiptelea     | Rhoiptelea chiliantha     |
| Juglandaceae      | Platycarya     | Platycarya strobilacea    |
| Juglandaceae      | Juglans        | Juglans sigillata         |
| Rosaceae          | Rosa           | Rosa davurica             |
| Myrtaceae         | Syzygium       | Syzygium aromaticum       |
| Myrtaceae         | Eucalyptus     | Eucalyptus globulus       |
| Myrtaceae         | Melaleuca      | Melaleuca leucadendra     |
| Nymphaeaceae      | Nymphaea       | Nymphaea lotus            |
| Altingiaceae      | Liquidambar    | Liquidambar formosana     |
| Fagaceae          | Quercus        | Quercus acutissima        |
| Fagaceae          | Quercus        | Quercus phillyraeoides    |
| Fagaceae          | Quercus        | Quercus suber             |
| Fagaceae          | Quercus        | Quercus aliena            |
| Fagaceae          | Quercus        | Quercus infectoria        |
| Fagaceae          | Castanopsis    | Castanopsis fissa         |
| Plantaginaceae    | Plantago       | Plantago major            |
| Geraniaceae       | Geranium       | Geranium thunbergii       |
| Melastomataceae   | Phyllagathis   | Phyllagathis rotundifolia |
| Sapindaceae       | Acer           | Acer truncatum            |
| Cercidiphyllaceae | Cercidiphyllum | Cercidiphyllum japonicum  |
| Fabaceae          | Fordia         | Fordia fruticosa          |
| Fabaceae          | Lotus          | Lotus corniculatus        |
| Fabaceae          | Haematoxylum   | Haematoxylum campechianum |
| Anacardiaceae     | Mangifera      | Mangifera indica          |
| Euphorbiaceae     | Euphorbia      | Euphorbia maculata        |
| Euphorbiaceae     | Euphorbia      | Euphorbia thymifolia      |
| Euphorbiaceae     | Euphorbia      | Euphorbia helioscopia     |
| Euphorbiaceae     | Euphorbia      | Euphorbia humifusa        |
| Paeoniaceae       | Paeonia        | Paeonia lactiflora        |
| Paeoniaceae       | Paeonia        | Paeonia suffruticosa      |
| Paeoniaceae       | Paeonia        | Paeonia hybr              |
| Crassulaceae      | Rhodiola       | Rhodiola rosea            |

---

|                |               |                           |
|----------------|---------------|---------------------------|
| Anacardiaceae  | Rhus          | Rhus typhina              |
| Anacardiaceae  | Toxicodendron | Toxicodendron verniciflum |
| Anacardiaceae  | Cotinus       | Cotinus coggygia          |
| Rosaceae       | Geum          | Geum japonicum            |
| Rosaceae       | Sanguisorba   | Sanguisorba officinalis   |
| Euphorbiaceae  | Excoecaria    | Excoecaria agallocha      |
| Euphorbiaceae  | Euphorbia     | Euphorbia jolkinii        |
| Euphorbiaceae  | Euphorbia     | Euphorbia watanabei       |
| Euphorbiaceae  | Mallotus      | Mallotus japonicus        |
| Crassulaceae   | Rhodiola      | Rhodiola sachalinensis    |
| Hamamelidaceae | Loropetalum   | Loropetalum chinense      |

---

**Table S2. Primer Sequences for qRT-PCR**

| Primer                            | 5' to 3'                   | length |
|-----------------------------------|----------------------------|--------|
| <i>fthl27-F</i>                   | GCTTTACGCTGGATACACCTACACC  | 25     |
| <i>fthl27-R</i>                   | CGCTCCTCCTCACTGTTCTTCTTG   | 25     |
| <i>plat-F</i>                     | CGTCAGTTCGTCAGGAATGGAGTG   | 24     |
| <i>plat-R</i>                     | AGTGTGCTCGCCTCTGGTCTC      | 21     |
| <i>aacs-F</i>                     | CCTCTCTTGTCCCAGTGCCAATG    | 24     |
| <i>aacs-R</i>                     | TCCAACACAGCCAGCCATTTTCG    | 22     |
| <i>LOC110438965-F</i>             | CTCTTGGTTTTGGAGAATCGGGATCG | 25     |
| <i>LOC110438965-R</i>             | ACAATCACACGGTGGATGAGAACTC  | 25     |
| <i>parp4-F</i>                    | TGCTGGAGGAGAGGCTGAACTG     | 22     |
| <i>parp4-R</i>                    | CATTGAGGCTGATTCTGGACACTGG  | 25     |
| <i>aldh3a2b-F</i>                 | TCAATCAGCGGCACTTCAAGAGAC   | 24     |
| <i>aldh3a2b-R</i>                 | CTCAGCACTGTTGGAGCGATGTAG   | 24     |
| <i>si:dkey-183n20.15-F</i>        | CATGTCGTTGGCGGCTCTTCC      | 21     |
| <i>si:dkey-183n20.15-R</i>        | AGTGCGTTCCGGTCTCTGG        | 20     |
| <i>rnf38-F</i>                    | CACCACCACCACCATCATCATCATC  | 25     |
| <i>rnf38-R</i>                    | CTTAACGCACCACCGCCACTC      | 21     |
| <i>trim13-F</i>                   | AGGCTCCAGTTCCACAGATCCG     | 22     |
| <i>trim13-R</i>                   | GCTCCATCCTGTCCTTGTGTTGTAG  | 25     |
| <i>trim8a-F</i>                   | TCCCACATCCAGACGCACCTC      | 21     |
| <i>trim8a-R</i>                   | AGACCGACACCTGCTCCACATC     | 22     |
| <i>otud1-F</i>                    | AACTCTCACCACCGTCACCAATAAC  | 25     |
| <i>otud1-R</i>                    | CGTGTGCTCTTCTGTATCGCTTCC   | 24     |
| <i>hmgcs1-F</i>                   | TTGAAGAGTCGGGCAAACTGATG    | 24     |
| <i>hmgcs1-R</i>                   | ACCAGCAACAACCAGAGCGTAAC    | 23     |
| <i>cers2a-F</i>                   | CGTACTCATCCTGCGTATGGCTATC  | 25     |
| <i>cers2a-R</i>                   | TCACTCTCCTGTCCCTTCTCGTCTTC | 25     |
| <i>acer1-F</i>                    | CCCGCAAACACTTCCCTTCCCTTC   | 23     |
| <i>acer1-R</i>                    | AAGCAGTTGAGAGCGTAGGCATTG   | 24     |
| <i>capn2b-F</i>                   | GTGTCCTGCCTGATGCGTCTTG     | 22     |
| <i>capn2b-R</i>                   | TCTTGAGTGCTGTGCTTTGAAGGG   | 24     |
| <i>cers3a-F</i>                   | CACTGCCATACGCTCTCATCTTCC   | 24     |
| <i>cers3a-R</i>                   | GTTGTGCTCCGCTCTGTGTCTG     | 22     |
| <i>cers6-F</i>                    | GGACGACCGCAGTGACATTGAG     | 22     |
| <i>cers6-R</i>                    | GACACAGGGACGAGGACAGGTAG    | 23     |
| <i>casp21-F</i>                   | GCCATGCTTTGCCTCTAGACTGAC   | 24     |
| <i>casp21-R</i>                   | AAACCCTGTGAATGCCCTGTGAAC   | 25     |
| <i><math>\beta</math>-actin-F</i> | AACGAACGACCAACCTAAACCTCTC  | 25     |
| <i><math>\beta</math>-actin-R</i> | CTCCCTTTCCAGTTTCCGCATCC    | 23     |

**Table S3.** Biological activities of PGG.

| NO. | pChEMBL* | Target                     | Target.Type    | Document ID   |
|-----|----------|----------------------------|----------------|---------------|
| 1   | 7.30     | Thrombin                   | single protein | CHEMBL1151307 |
| 2   | 6.77     | Coagulation factor X       | single protein | CHEMBL1151307 |
| 3   | 6.52     | Anthrax toxin receptor 2   | single protein | CHEMBL2321858 |
| 4   | 6.33     | Squalene monooxygenase     | single protein | CHEMBL1155741 |
| 5   | 5.96     | Genome polyprotein         | single protein | CHEMBL3232942 |
| 6   | 5.80     | NS3                        | single protein | CHEMBL1137108 |
| 7   | 5.79     | HCT-116                    | cell-line      | CHEMBL4118193 |
| 8   | 5.63     | Salivary $\alpha$ -amylase | single protein | CHEMBL3616379 |
| 9   | 5.50     | Xanthine dehydrogenase     | single protein | CHEMBL1147277 |
| 10  | 5.42     | Beta-secretase 1           | single protein | CHEMBL3286369 |
| 11  | 5.40     | Protein kinase C (PKC)     | protein family | CHEMBL1149998 |
| 12  | 5.35     | HT-29                      | cell-line      | CHEMBL4118193 |
| 13  | 4.92     | Neuraminidase              | single protein | CHEMBL3232942 |
| 14  | 4.82     | HIV1                       | organism       | CHEMBL1126373 |
| 15  | 4.03     | HepG2                      | cell-line      | CHEMBL3232942 |

\* acquired from ChEMBL database on May 20, 2022 (<https://www.ebi.ac.uk/chembl/>).

pChEMBL values were officially calculated by  $-\lg(\text{EC}_{50}$  or  $\text{IC}_{50}$ ).

**Table S4.** Pathways associated with the action of PGG.

| KEGG ID  | KEGG Name                                    | $-\log(p)$ | Matched Features                     |
|----------|----------------------------------------------|------------|--------------------------------------|
| dre00600 | Sphingolipid metabolism                      | 5.88       | Sphingosine (C00319)                 |
| dre04210 | Apoptosis                                    | 6.00       | Sphingosine (C00319)                 |
| dre04217 | Necroptosis                                  | 6.00       | Sphingosine (C00319)                 |
| dre04371 | Apelin signaling pathway                     | 1.38       | Sphingosine (C00319)                 |
| dre00053 | Ascorbate and aldarate metabolism            | 1.82       | D-Glucuronolactone<br>(C02670)       |
| dre00290 | Valine, leucine, and isoleucine biosynthesis | 6.00       | 2-Methylmaleate(C02226)              |
| dre00650 | Butanoate metabolism                         | 3.56       | (R)-3-Hydroxybutanoate<br>(C01089)   |
| dre01210 | 2-Oxocarboxylic acid metabolism              | 1.80       | 2-Methylmaleate(C02226)              |
| dre01230 | Biosynthesis of amino acids                  | 4.18       | 2-Methylmaleate(C02226)              |
| dre00770 | Pantothenate and CoA biosynthesis            | 5.17       | Pantetheine 4'-phosphate<br>(C01344) |
